# Supplementary material for: Transcription factor StWRKY1 regulates phenylpropanoid metabolites conferring late blight resistance in potato
Source: PubMed Central journal article supplement (PMC4765800; doi:10.1093/jxb/erv434), 2015-09-28
Supplement: supp_erv434_jexbot155895_file001.pdf [file supp_erv434_jexbot155895_file001.pdf]

**The transcription factor *StWRKY1* regulates secondary cell wall thickening metabolites in potato resistant to late blight**

Kalenahalli N. Yogendra, Arun Kumar, Kobir Sarkar, Yunliang Li, Pushpa Doddaraju, Kareem A. Mosa, Raj Duggavathi and Ajjamada C. Kushalappa

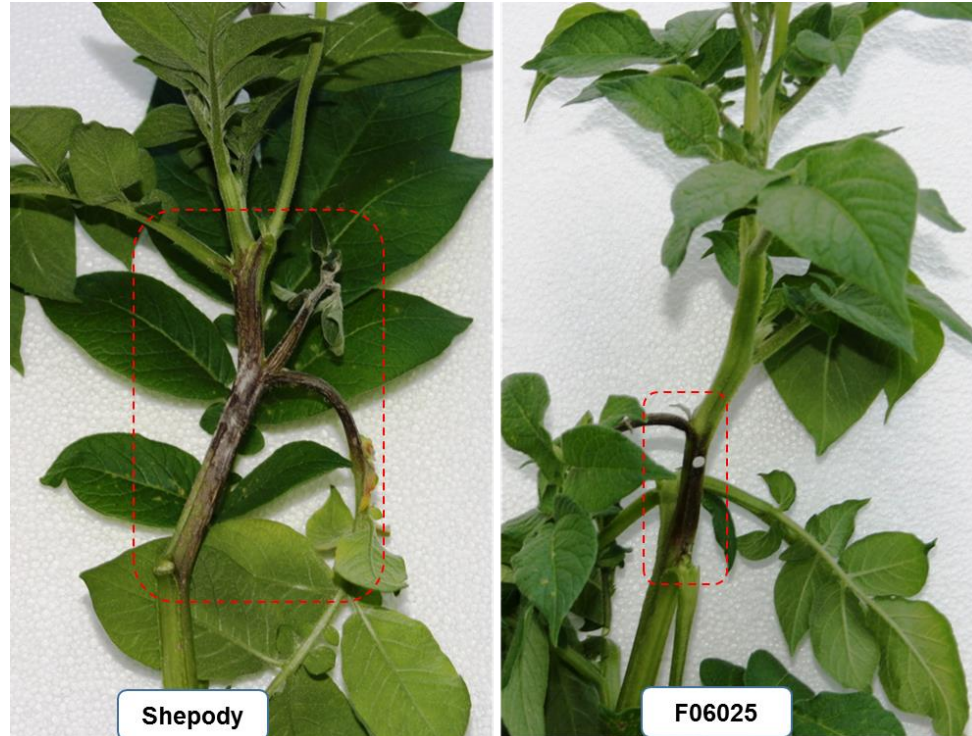

Fig. S1. *Phytophthora infestans* infected potato stems with susceptible (Shepody) and resistant (F06025) genotypes, at 9 dpi.

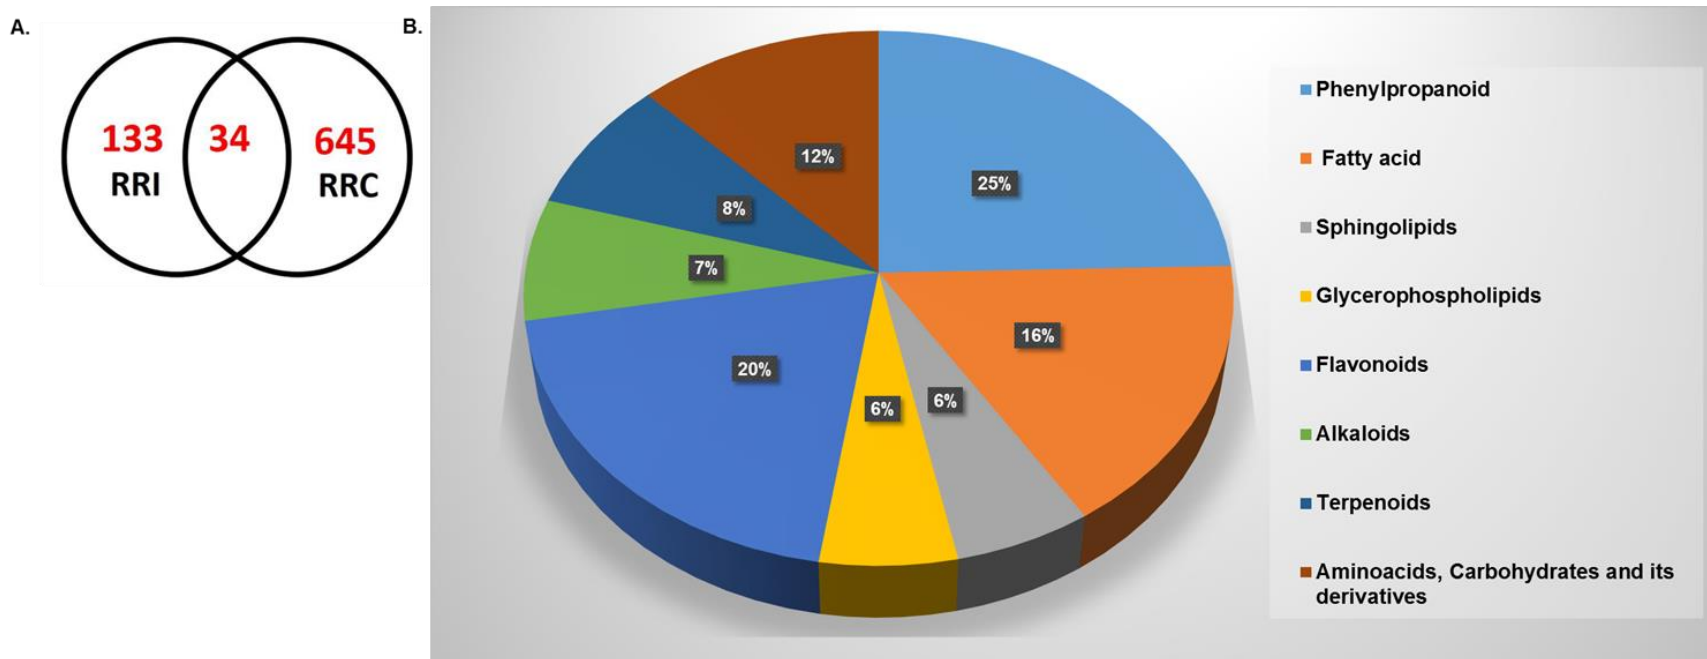

Fig. S2. (A) The number of resistance related metabolites identified in stem of resistant potato genotype inoculated with water or *Phytophthora infestans*. Acronyms: RRC, resistance related constitutive; RRI, resistance related induced metabolites; (B) Resistance related (RR) metabolites identified in the resistant potato genotype, inoculated with mock-solution or *P. infestans* and their classification according to chemical groups.

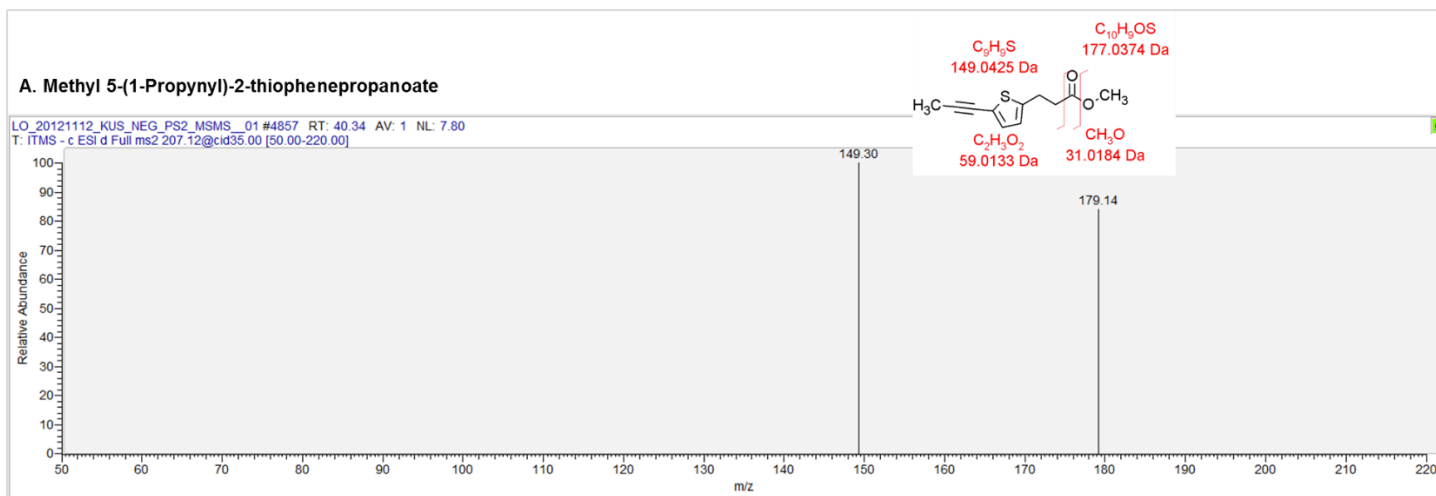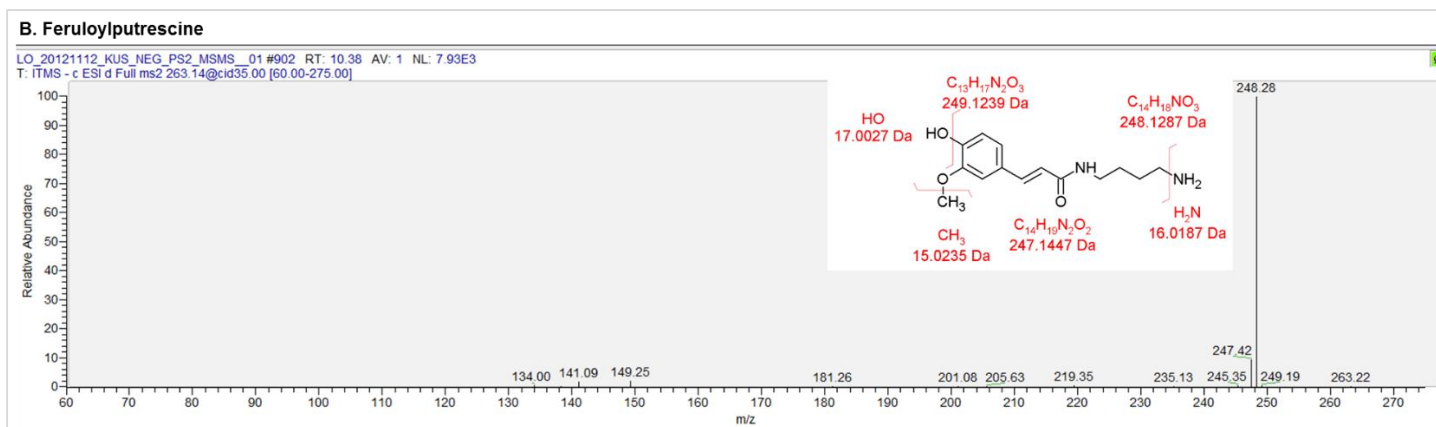

### C. Caffeic acid 3-glucoside

LO\_20121112\_KUS\_NEG\_PS2\_MSMS\_01 #2161-2161 RT: 19.93-19.93 AV: 23 NL: 6.35E2  
T: ITMS - c ESI d Full ms2 341.23@cid35.00 [80.00-355.00]

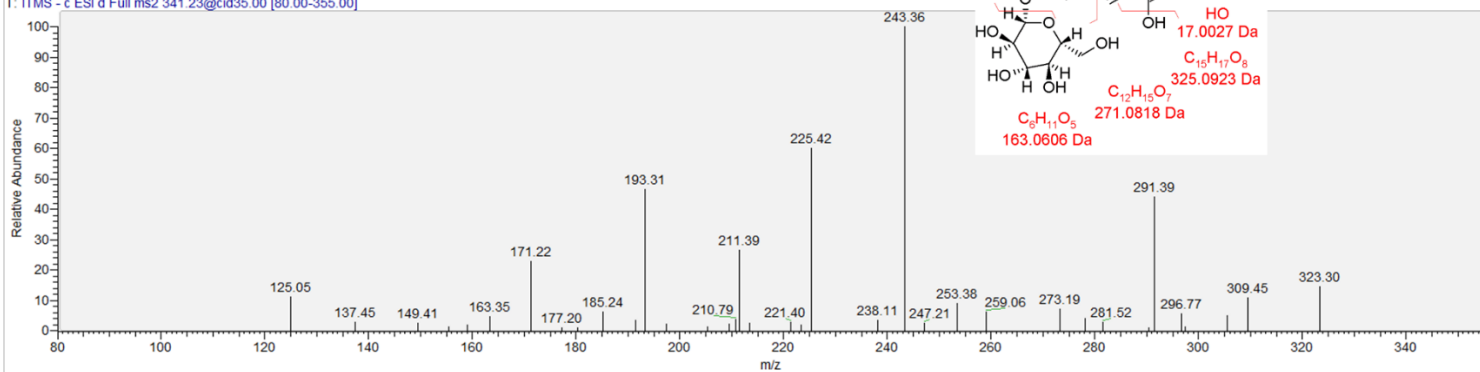

### D. 10-Acetoxygustroside

LO\_20121112\_KUS\_NEG\_PS2\_MSMS\_01 #1428 RT: 14.49 AV: 1 NL: 3.45E2  
T: ITMS - c ESI d Full ms2 581.22@cid35.00 [150.00-595.00]

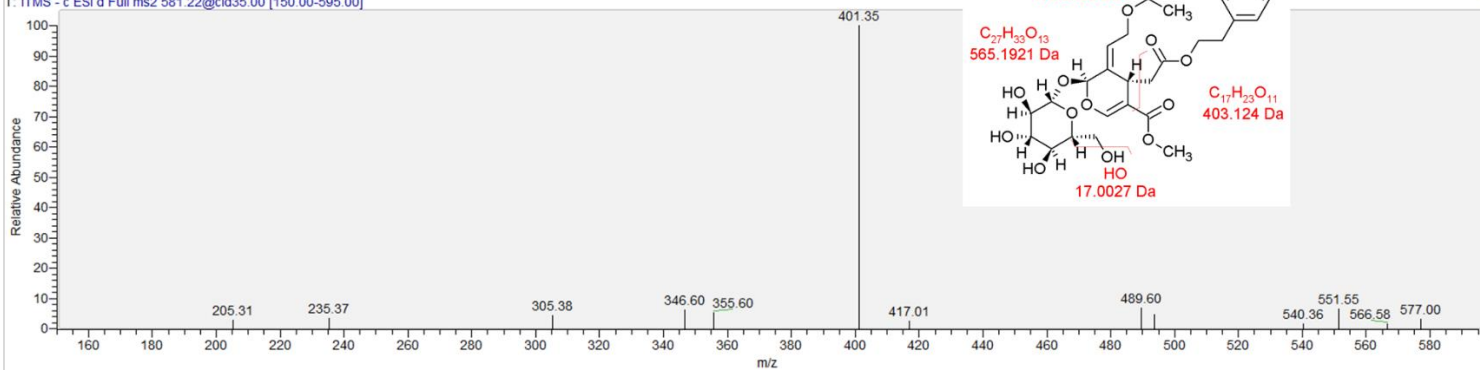

### E. 1,2-di-O-sinapoyl-&beta;-D-glucose

LO\_20120925\_KUS\_NEG\_MSMS\_PL10\_01 #2403-3916 RT: 14.18-22.61 AV: 8 NL: 1.93E3  
 T: Average spectrum MS2 591.23 (2403-3916)

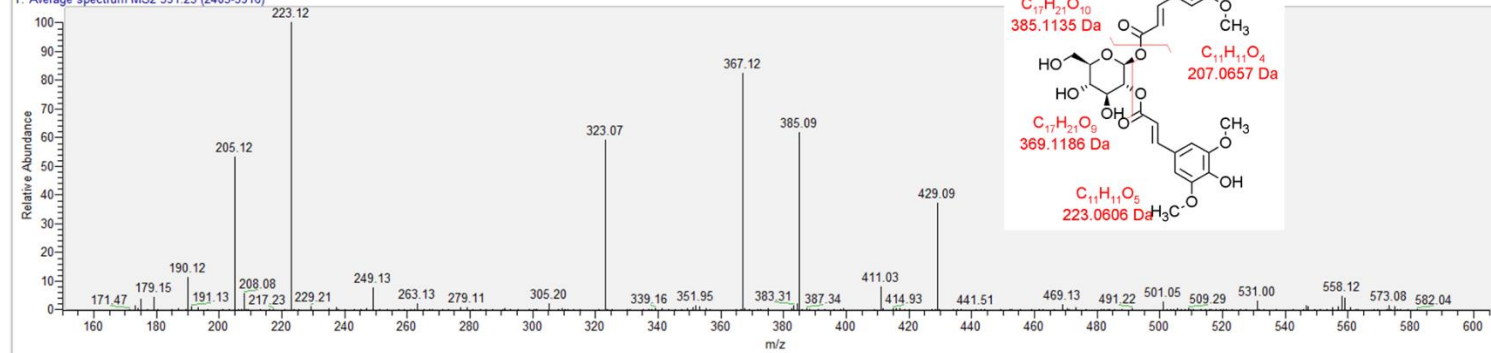

### F. Cer(d14:2(4E,6E)/16:0)

LO\_20120925\_KUS\_NEG\_MSMS\_PL10\_01 #2135-2163 RT: 12.66-12.82 AV: 3 NL: 5.21E1  
 T: Average spectrum MS2 478.14 (2135-2163)

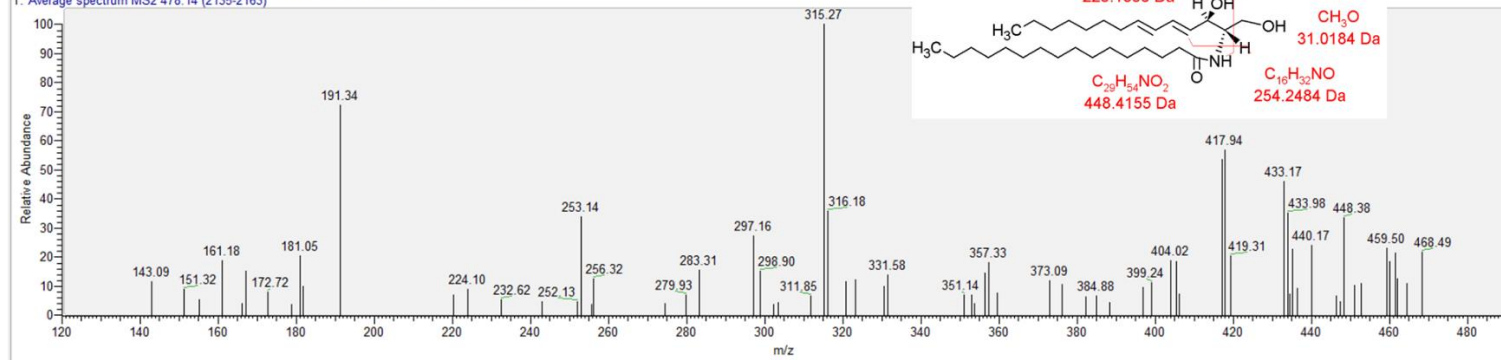

### G. Cer(d18:1/16:0)

LO\_20120925\_KUS\_NEG\_MSMS\_PL10\_01 #4003 RT: 23.10 AV: 1 NL: 7.47E1  
T: ITMS - c ESI d Full ms2 536.23@cid35.00 [135.00-550.00]

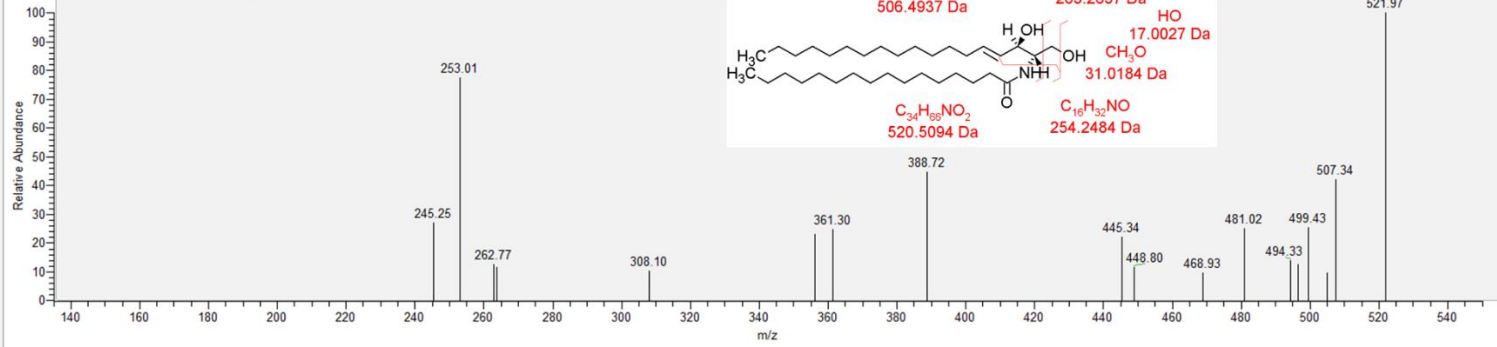

### H. Cer(d18:0/20:0)

LO\_20120925\_KUS\_NEG\_MSMS\_PL10\_01 #636-4438 RT: 3.91-25.59 AV: 4 NL: 2.85E1  
T: Average spectrum MS2 594.52 (636-4438)

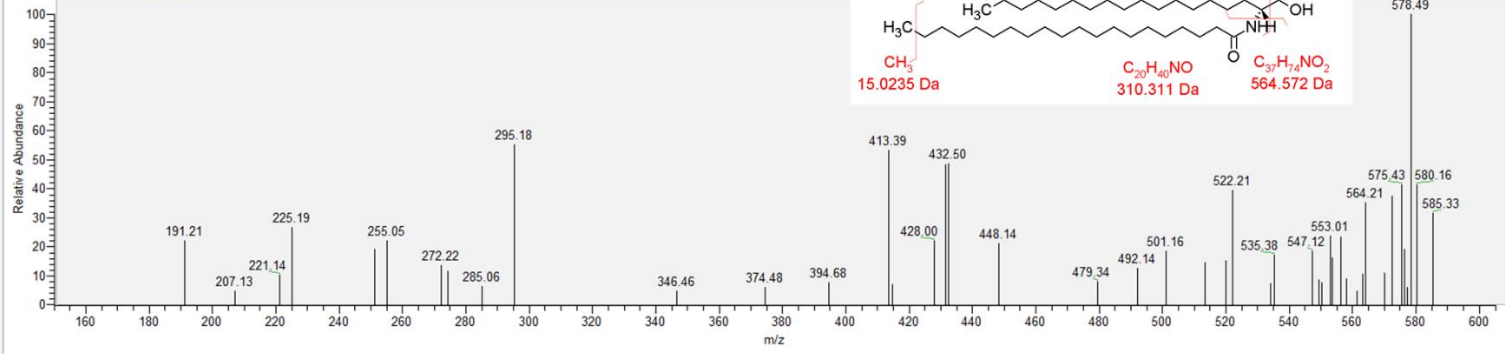

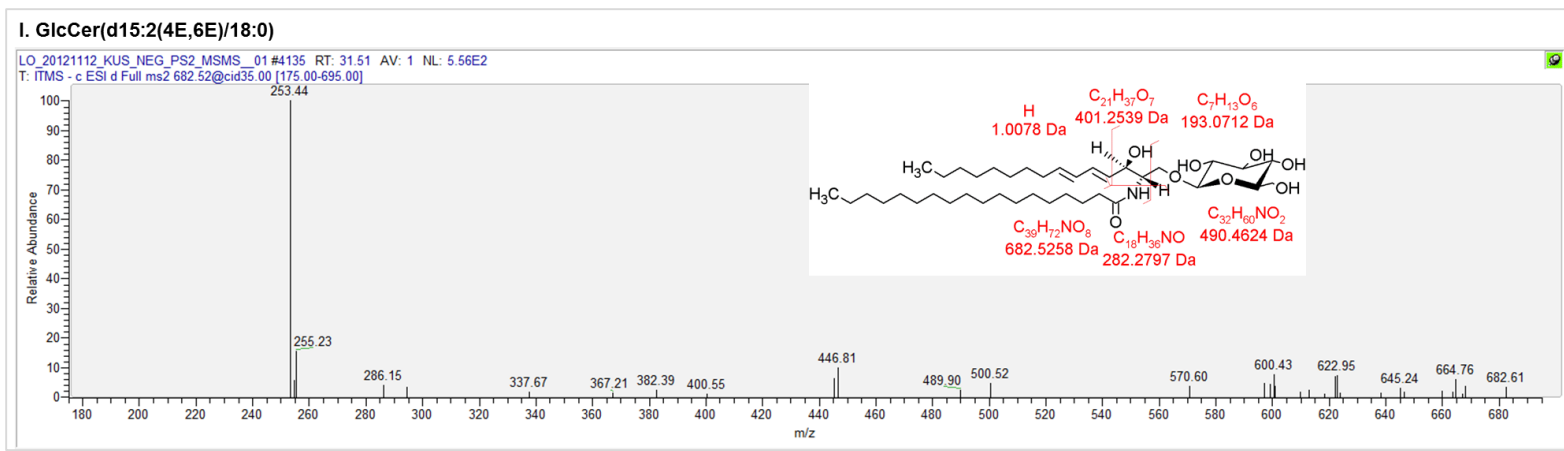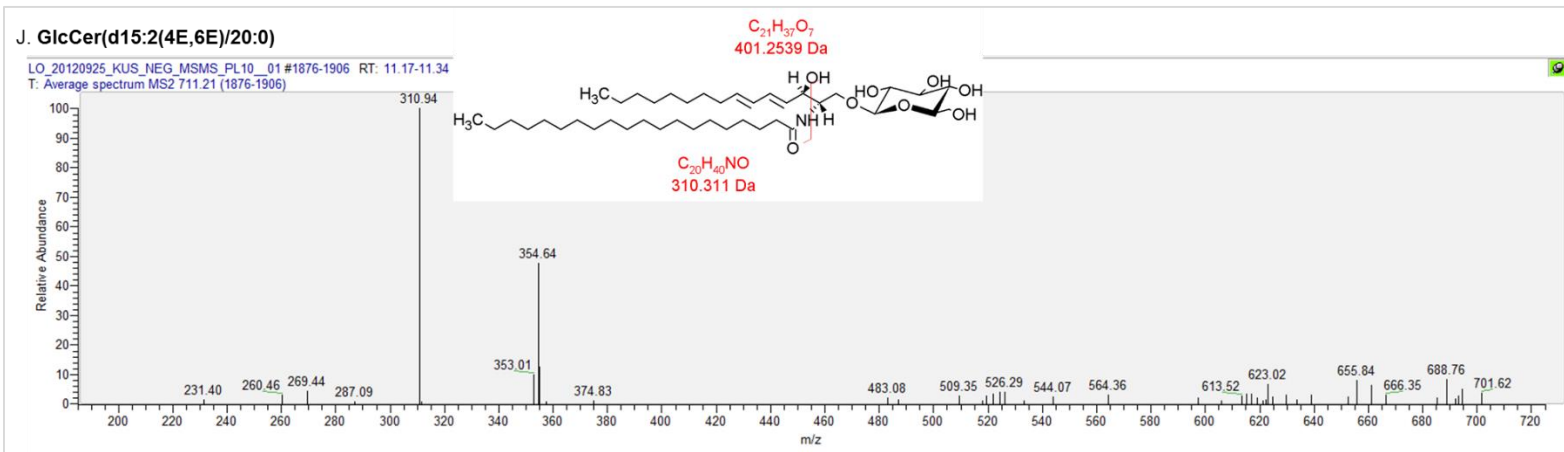

Fig. S3. *In silico* fragmentation of resistance related metabolites

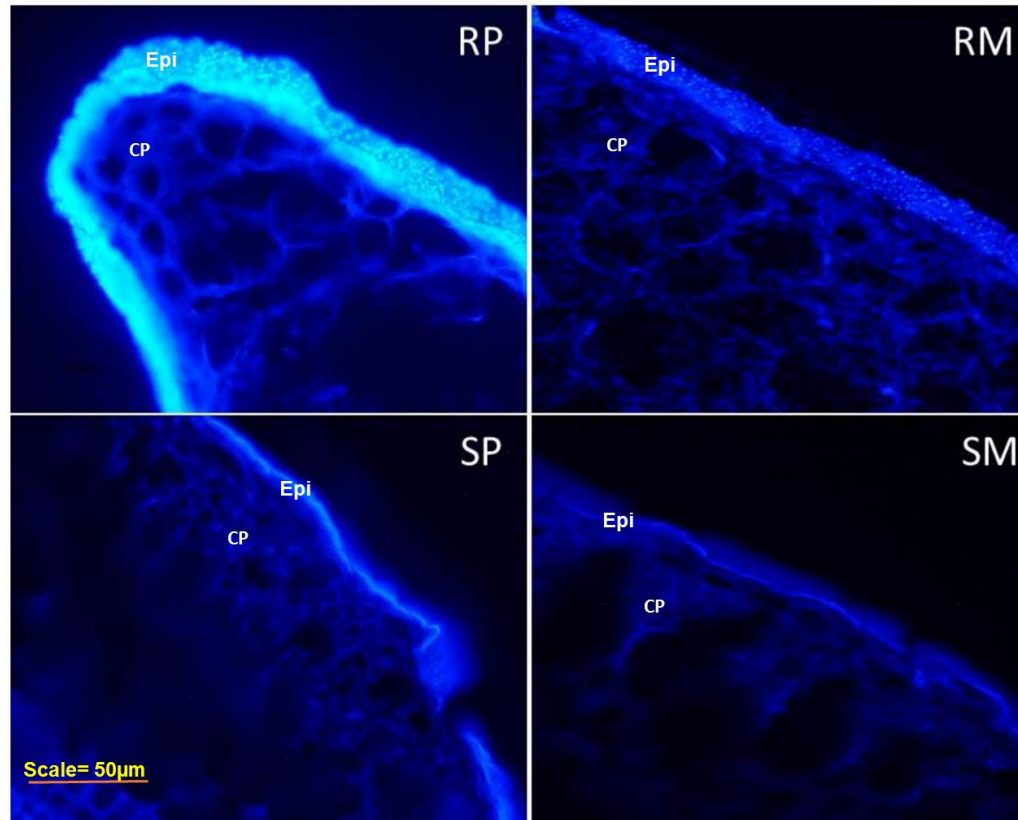

Fig. S4. Laser scanning confocal micrographs of stem sections, exhibiting secondary cell wall thickening, due to hydroxycinnamic acid amides (HCAAs- blue fluorescence). RP is resistant genotype with *P. infestans* inoculation, RM is resistant genotype with mock inoculation, SP is susceptible genotype with *P. infestans* inoculation, SM is susceptible genotype with mock inoculation. Epi is epidermis, CP is cortical parenchyma.



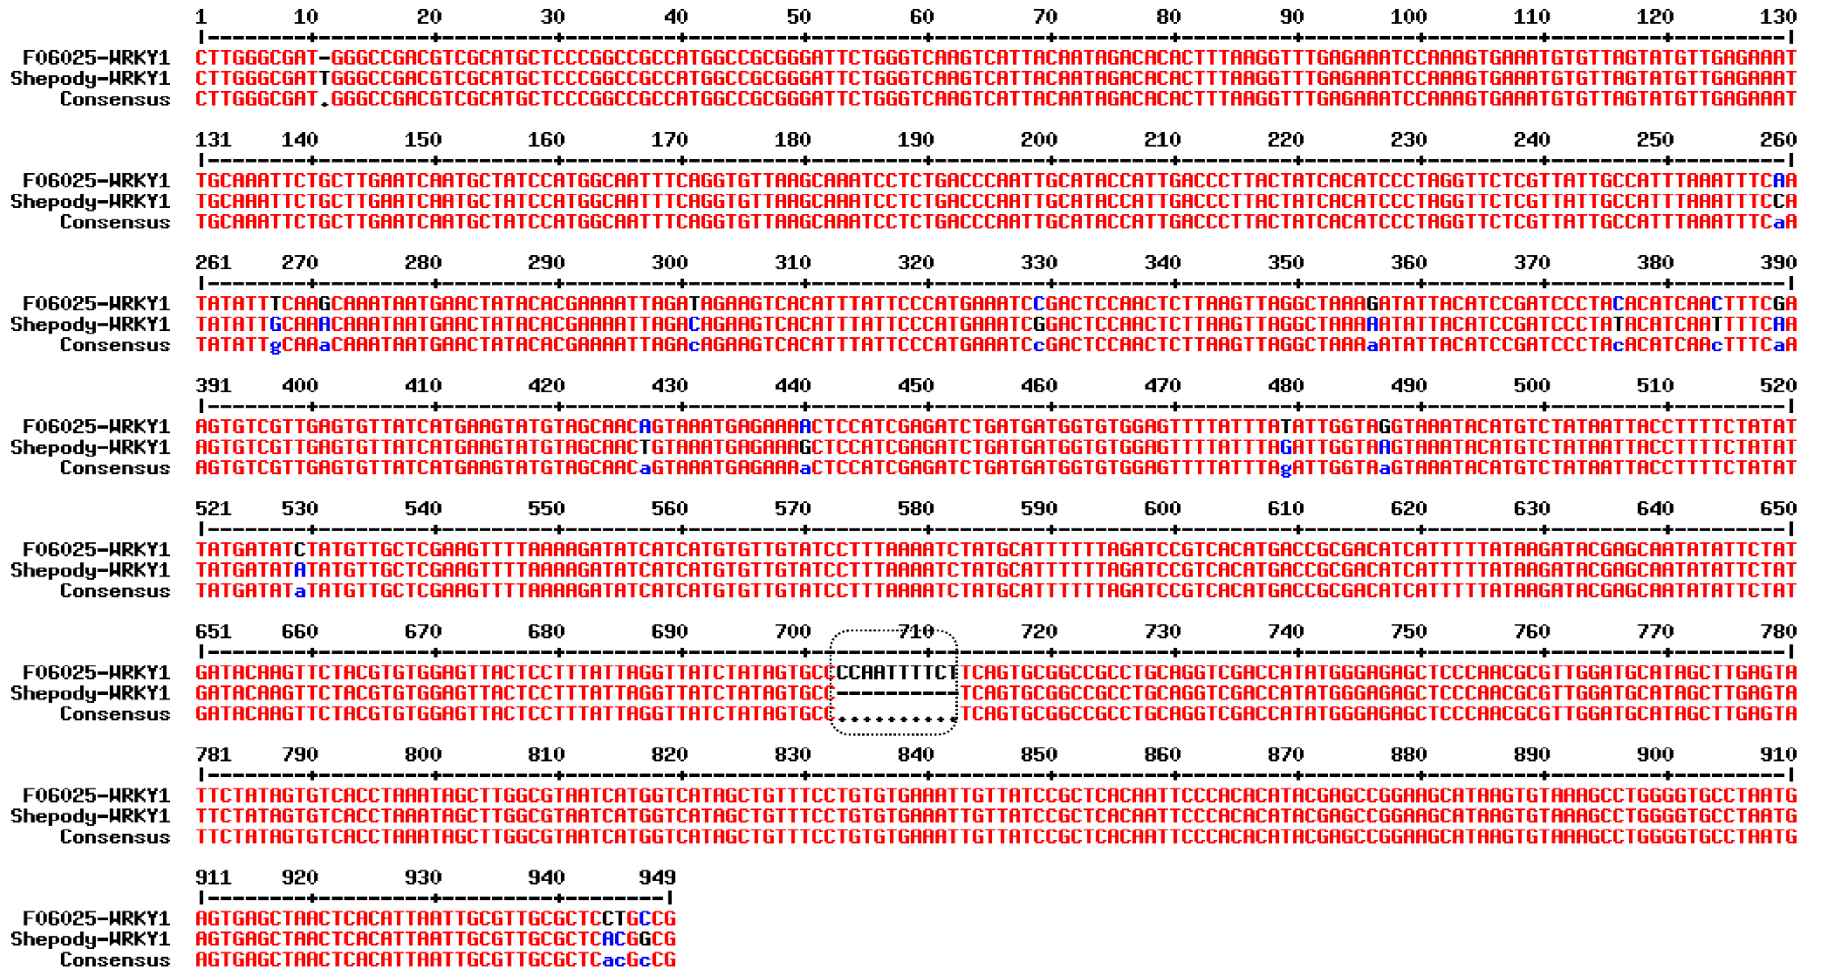

Fig. S5. Comparison of sequence variation between resistant (F06025) and susceptible (Shepody) *StWRKY1* promoter region.

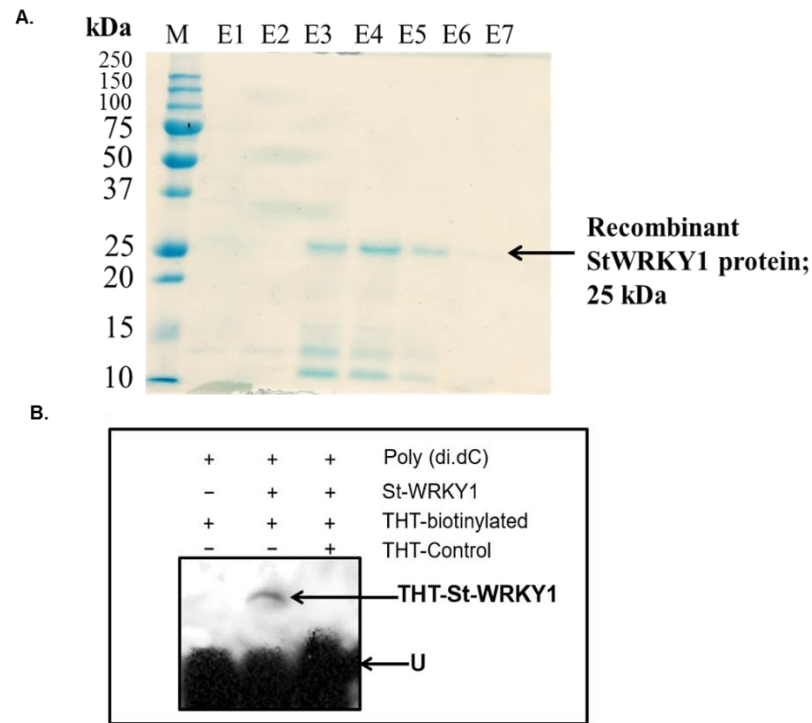

Fig. S6. (A) Analysis of purified recombinant StWRKY1 protein on 12% Sodium dodecyl sulphate-Polyacrylamide gel electrophoresis. StWRKY1 was cloned in pTrc HisB vector (Invitrogen, USA), overexpressed in *Escherichia coli* BL21 cells and was purified by affinity chromatography using nickel NTA as matrix. Different protein fraction were loaded and electrophoresed in 12% SDS-polyacrylamide gel and were stained with Sigma EZBlue™ Gel Staining Reagent (Sigma, USA). M, Precision plus Protein™ Prestained Marker (Biorad, Canada); E1 to E7 represent various eluted protein fractions. (B) Electrophoretic mobility gel shift assay (EMSA) showing DNA-protein interaction of THT promoter with StWRKY1. The position of the specifically retarded DNA/protein complex (THT-WRKY1) and that of the free probe (U) is also shown on the right side of the panel with an arrow mark.

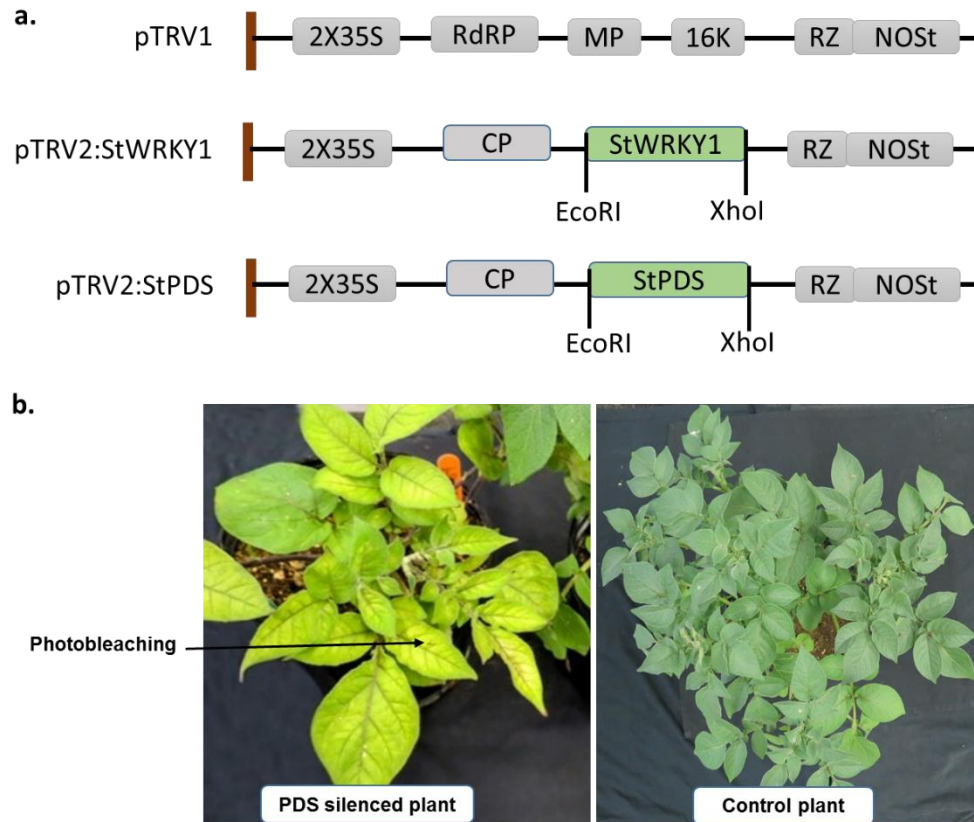

Fig. S7. (A) Schematic representation of tobacco rattle virus (TRV) based virus induced gene silencing (VIGS) vectors. TRV cDNA clones were placed in between the duplicated cauliflower mosaic virus (CaMV) 35S promoter (2 X 35S) and the nopaline synthase terminator (NOS) in a T-DNA vector. LB and RB refer to left and right borders of T-DNA. Rz, self-cleaving ribozyme. (b) Silencing of the phytoene desaturase (PDS) gene. Infection of recombinant TRV carrying the PDS sequence silences endogenous PDS in potato plants and causes inhibition of carotenoid biosynthesis resulting in the photobleaching phenotype.

**Table S1. Primer sequences used for quantifying resistance related gene expression in potato genotypes**

| Genbank name                      | Gene name        | Forward primer (5'-3')         | Reverse primer (5'-3')            |
|-----------------------------------|------------------|--------------------------------|-----------------------------------|
| <b>A. Biomass quantification</b>  |                  |                                |                                   |
| GQ371195.1                        | O-8              | GAAAGGCATAGAAGGTAGA            | TAACCGACCAAGTAGTAAA               |
| AB061263.1                        | StEf1- $\alpha$  | ATTGGAAACGGATATGCTCCA          | TCCTTACCTGAACGCCTGTCA             |
| Z33382.1                          | b-tubulin        | ATGTTTCAGGCGCAAGGCTT           | TCTGCAACCGGGTCATTCAT              |
| <b>B. qRT-PCR primers</b>         |                  |                                |                                   |
| AF150686.1                        | St4CL            | ATCCTGAGGCCACAGCTAGA           | TTACGGGACAACAGCAGCAT              |
| JX896425.1                        | StTHT            | TGTTGTTGTCAGCTGTGGCT           | TTTGCAAAGGCTTGAAGGGC              |
| PGSC0003DMT400038501 <sup>a</sup> | SpTyDC           | AGTGGTGGTGGAGGTGTACT           | AGGTCCCAGATAGGGTTCGTT             |
| AJ278507.1                        | StWRKY1          | GAGGAAATATGGACAAAAGGCTG        | TTTGTCATGGGATGTGAATGC             |
| AB061263.1                        | StEf1- $\alpha$  | ATTGGAAACGGATATGCTCCA          | TCCTTACCTGAACGCCTGTCA             |
| Z33382.1                          | b-tubulin        | ATGTTTCAGGCGCAAGGCTT           | TCTGCAACCGGGTCATTCAT              |
| <b>C. Primers for sequencing</b>  |                  |                                |                                   |
| AJ278507.1                        | StWRKY1          | TCTAAAATGGAGAATTATGCAACAA      | TTAAAAGGAAGTATAGATTTGCATCTGA      |
| PGSC0003DMT400069966 <sup>a</sup> | StWRKY1 promoter | CTGGGTCAAGTCATTACAATAGA        | TTTCTTCATGGGGCACTATAGA            |
| <b>D. Primers for BiFC assay</b>  |                  |                                |                                   |
| AJ278507.1                        | StWRKY           | GTCGACATGGAGAATTATGCAACAAT     | GAATTCAAAGGAAGTATAGATTTGCA        |
| AB091780.1                        | StMEK1           |                                |                                   |
| <b>E. Primers for LUC assay</b>   |                  |                                |                                   |
| AF150686.1                        | St4CL            | CTCGAGGAGTGTCAATTTTGACCAATTTTT | GGATCCATCTGGGCATCTTGAGAGCTAA      |
| JX896425.1                        | StTHT            | CTCGAGTCATCGCCACAAGTTATGA      | GGATCCGGGAAAGTATTTAGTTAAATTTGGAGA |
| PGSC0003DMT400038501 <sup>a</sup> | SpTyDC           | CTCGAG CCCACCCCTATCGCCTAT      | GGATCCTTCAATTTGTGTGTATGTTGTCTT    |

<sup>a</sup> Solanaceae Genomics Resource, Michigan State University, USA.

**Table S2. Resistance related detected in resistant potato genotype following *P. infestans* or mock-solution inoculation**

| Observed mass (Da)         | Exact mass (Da) | RT (Min) | AME (ppm) | Metabolite names                            | Observed fragmentation                                                                       | Database fragmentation                                                                 | Database ID                      |
|----------------------------|-----------------|----------|-----------|---------------------------------------------|----------------------------------------------------------------------------------------------|----------------------------------------------------------------------------------------|----------------------------------|
| <b>A. Phenylpropanoids</b> |                 |          |           |                                             |                                                                                              |                                                                                        |                                  |
| 148.0530                   | 148.0524        | 2.83     | 1.60      | trans-Cinnamic acid                         | <b>148.20</b> ,104.05, <b>103.30</b> , 91.48                                                 | <b>147.0</b> , <b>103.05</b> , 101.04, 77.04                                           | C00423                           |
| 162.0320                   | 162.0316        | 2.50     | 2.14      | 4-hydroxycoumarin                           | <b>161.02</b> , 131.06, <b>116.54</b>                                                        | <b>161.02</b> , <b>117.03</b> , 41.00                                                  | CPD-12111                        |
| 165.0793                   | 165.0790        | 1.62     | 2.15      | L-Phenylalanine                             | <b>163.90</b> , <b>149.05</b> , <b>147.12</b> , <b>120.22</b> , <b>72.05</b>                 | <b>163.9</b> , <b>148.8</b> , <b>147.2</b> , 146.5, <b>120.1</b> , <b>71.9</b>         | PHE                              |
| 166.0633                   | 166.0630        | 1.898    | 9.85      | Dihydro-3-coumaric acid                     | <b>150.14</b> , <b>149.01</b> , 123.14, 95.14                                                | <b>149.00</b> , 121.06, 119.05, 106.04                                                 | CPD-12218                        |
| 174.0533                   | 174.0528        | 18.61    | 2.90      | Shikimate                                   | 175.32, <b>157.11</b> ,132.94, 131.05                                                        | <b>157.05</b> ,17.00                                                                   | C00493<br><i>In silico</i>       |
| 181.0742                   | 181.0739        | 0.72     | 1.88      | &alpha;-amino oxy- &beta;-phenyl propionate | <b>163.19</b> , <b>136.16</b> , <b>119.16</b> , <b>93.09</b>                                 | <b>162.05</b> , <b>135.04</b> , <b>120.04</b> , <b>119.04</b> , <b>93.03</b>           | CPD-7021                         |
| 192.0273                   | 192.0270        | 0.44     | 1.48      | Citrate                                     | <b>155.15</b> , <b>148.12</b> , <b>129.20</b> , <b>111.00</b>                                | <b>154.60</b> , <b>148.20</b> , <b>129.20</b> , <b>111.10</b>                          | CIT                              |
| 192.0637                   | 192.0634        | 5.83     | 1.50      | Quinate                                     | <b>191.07</b> , <b>173.07</b> , <b>171.08</b> , <b>126.98</b> , <b>111.03</b> , <b>92.99</b> | <b>191.3</b> , <b>173.4</b> , <b>170.8</b> , <b>127.0</b> , <b>111.4</b> , <b>93.0</b> | C00296                           |
| 194.0585                   | 194.0579        | 4.40     | 2.89      | Ferulic acid                                | 193.22, <b>178.34</b> ,175.10, 173.13,                                                       | <b>178.02</b> ,134.03,133.02                                                           | METLIN                           |
| 208.0552                   | 208.0558        | 23.47    | 2.71      | Methyl 5-(1-Propynyl)-2-thiophenepropanoate | 179.14, <b>149.30</b>                                                                        | 177.03, <b>149.04</b>                                                                  | 90185-Metlin<br><i>In silico</i> |
| 264.1472                   | 264.1474        | 10.54    | 0.73      | Feruloylputrescine                          | <b>249.19</b> , <b>248.28</b> , <b>247.42</b>                                                | <b>249.12</b> , <b>248.12</b> , <b>247.14</b>                                          | <i>In silico</i>                 |
| 300.0844                   | 300.0845        | 1.21     | 0.43      | Salicylate &beta;-D-glucose ester           | 217.05, 201.30, 161.33, <b>137.11</b> , 93.08                                                | 179.26, <b>137.15</b>                                                                  | CPD-12629                        |

|                         |          |       |      |                                    |                                                                |                                                       |                                              |
|-------------------------|----------|-------|------|------------------------------------|----------------------------------------------------------------|-------------------------------------------------------|----------------------------------------------|
| 306.1690                | 306.1692 | 12.35 | 0.64 | Feruloylagmatine                   | 288.23, <b>263.25</b> , 248.28, <b>149.12</b> , 134.15         | 289.14, <b>263.13</b> , 177.05, <b>149.06</b>         | CPD-12236<br>(Gunnaiah <i>et al.</i> , 2012) |
| 313.1317                | 313.1314 | 17.25 | 0.86 | N-Feruloyltyramine                 | <b>178.13</b> , 177.12, 166.15, 148.24,                        | <b>178.0</b> , 122, 138                               | C02717<br>(Yogendra <i>et al.</i> , 2015)    |
| 329.1271                | 329.1263 | 15.18 | 2.45 | N-Feruloyloctopamine               | 328.37, <b>313.76</b> , <b>312.43</b> , 269.20,                | <b>314.10</b> , <b>312.12</b>                         | METLIN<br>(Yogendra <i>et al.</i> , 2015)    |
| 342.0946                | 342.0951 | 8.26  | 1.45 | Caffeic acid 3-glucoside           | 323.30, 273.19, 177.20, <b>163.35</b>                          | 325.09, 271.08, 179.03, <b>163.06</b>                 | C10431<br><i>In silico</i>                   |
| 354.0958                | 354.0951 | 6.76  | 1.86 | Scopolin                           | 330.99, 192.05, <b>191.08</b> , 178.96,                        | 339.07, <b>191.03</b> , 163.06                        | C01527<br>(Yogendra <i>et al.</i> , 2015)    |
| 368.1115                | 368.1107 | 8.58  | 2.11 | 5-O-Feruloylquinic acid            | 351.90, <b>193.13</b> , 191.05                                 | 353.08, 351.10, <b>193.05</b> , 175.06                | C02572                                       |
| 386.1215                | 386.1213 | 3.23  | 0.50 | 1-O-Sinapoyl-beta-D-glucose        | <b>247.23</b> , <b>223.04</b> , <b>205.19</b>                  | <b>247.06</b> , <b>223.06</b> , <b>205.04</b>         | C01175                                       |
| 582.1941                | 582.1949 | 14.24 | 1.32 | 10-Acetoxyiligustroside            | <b>566.58</b> , <b>401.35</b>                                  | <b>565.19</b> , <b>403.12</b> , <b>179.07</b>         | 90532-Metlin<br><i>In silico</i>             |
| 592.1790                | 592.1792 | 13.90 | 0.32 | 1,2-di-O-sinapoyl-&beta;-D-glucose | 429.23, <b>385.18</b> , 367.15, 323.07, <b>223.16</b> , 205.15 | <b>385.11</b> , 369.11, <b>223.06</b> , 207.06        | 12-BIS-O-SINAPOYL-BETA-D-GLUCOSIDE           |
| <b>B. Sphingolipids</b> |          |       |      |                                    |                                                                |                                                       |                                              |
| 479.4357                | 479.4338 | 30.83 | 3.87 | Cer(d14:2(4E,6E)/16:0)             | <b>448.38</b> , <b>253.14</b> , 252.13, <b>224.10</b>          | <b>448.41</b> , <b>254.24</b> , <b>225.18</b>         | LMSP02010051<br><i>In silico</i>             |
| 537.5138                | 537.5121 | 23.48 | 3.10 | Cer(d18:1/16:0)                    | <b>521.97</b> , <b>507.34</b> , 388.72, <b>253.01</b>          | <b>520.50</b> , <b>506.49</b> , 283.26, <b>254.24</b> | LMSP02010004<br><i>In silico</i>             |

|                                |          |       |      |                                                     |                                       |                                       |                                  |
|--------------------------------|----------|-------|------|-----------------------------------------------------|---------------------------------------|---------------------------------------|----------------------------------|
| 595.5880                       | 595.5903 | 36.05 | 3.86 | Cer(d18:0/20:0)                                     | <b>580.16, 578.49, 564.21, 285.06</b> | <b>580.56, 564.57, 310.31, 285.27</b> | LMSP02020009<br><i>In silico</i> |
| 683.5331                       | 683.5336 | 30.81 | 0.79 | GlcCer(d15:2(4E,6E)/18:0)                           | <b>682.61, 489.90, 400.55, 286.15</b> | <b>682.52, 490.46, 401.25, 282.27</b> | LMSP0501AA58<br><i>In silico</i> |
| 711.5643                       | 711.5649 | 30.11 | 0.89 | GlcCer(d15:2(4E,6E)/20:0)                           | 354.64, 353.01, <b>310.94</b>         | 401.25, <b>310.31</b>                 | LMSP0501AA59                     |
| 851.5776                       | 851.5793 | 23.52 | 2.04 | (3'-sulfo)Galbeta-Cer(d18:0/20:0(2OH))              | 704.41, 522.05, <b>325.41</b>         | 525.27, <b>326.30</b>                 | LMSP06020005<br><i>In silico</i> |
| <b>C. Glycerophospholipids</b> |          |       |      |                                                     |                                       |                                       |                                  |
| 537.3090                       | 537.3067 | 23.46 | 4.37 | 1-(9Z-nonadecenoyl)-glycero-3-phosphoserine         | <b>536.21, 520.84, 339.37, 197.29</b> | <b>536.29, 522.28, 339.28, 198.01</b> | LMGP03050019                     |
| 537.3790                       | 537.3794 | 23.48 | 0.82 | 1-hexadecyl-2-propionyl-sn-glycero-3-phosphocholine | 455.12, <b>354.30, 182.98</b>         | 522.35, 464.35, <b>355.32, 182.05</b> | LMGP01020068                     |
| 537.4151                       | 537.4158 | 23.48 | 1.36 | 1-octadecyl-2-ethyl-sn-glycero-3-phosphocholine     | <b>493.57, 455.12</b>                 | <b>492.38</b>                         | LMGP01040053                     |

**AME:** Accurate Mass Error= ((Observed mass - expected mass) / expected mass) X 10<sup>6</sup>, RT: Retention time

**Database ID examples:** Number-METLIN, LMP-LIPIDMAPS, KEGG-C05610, KNAPSACK- C00002775, HMDB-HMDB33026, and PMN-Plant Metabolic Network, *In silico:* In silico fragmentation

## References

- Gunnaiah, R., Kushalappa, A. C., Duggavathi, R., Fox, S. and Somers, D. J. (2012) Integrated metabolo-proteomic approach to decipher the mechanisms by which wheat QTL (Fhb1) contributes to resistance against *Fusarium graminearum*. *PLoS one*, **7**, e40695.
- Yogendra, K. N., Kushalappa, A. C., Sarmiento, F., Rodriguez, E. and Mosquera, T. (2015) Metabolomics deciphers quantitative resistance mechanisms in diploid potato clones against late blight. *Functional Plant Biology*, **42**, 284-298.



**Table S3. Promoter analysis of resistance related gene in resistant potato genotype**

| <b>4-CL promoter</b>                                                 | <b>THT promoter</b>                                                            | <b>TYDC promoter</b>                                                           | <b>HCT promoter</b>                                                      |
|----------------------------------------------------------------------|--------------------------------------------------------------------------------|--------------------------------------------------------------------------------|--------------------------------------------------------------------------|
| 4cl-CMA2a: light responsive element                                  | 3-AF1 binding site: light responsive element                                   | ABRE: cis-acting element involved in the abscisic acid responsiveness          | 3-AF3 binding site: light responsive element                             |
| 4cl-CMA2b: light responsive element                                  | ACE: cis-acting element involved in light responsiveness                       | ARE: cis-acting regulatory element essential for the anaerobic induction       | AACA_motif: involved in endosperm-specific negative expression           |
| AC-I: negative regulation of phloem expression                       | AE-box: part of a module for light response                                    | Box I: light responsive element                                                | AC-I: negative regulation of phloem expression                           |
| AC-II: enhanced xylem expression and repressed phloem                | ARE: cis-acting regulatory element essential for the anaerobic induction       | Box 4: light responsive element                                                | ACE: cis-acting element involved in light responsiveness                 |
| <b>Box-W1: WRKY1 protein binding site</b>                            | <b>Box-W1: WRKY1 protein binding site</b>                                      | <b>Box-W1: WRKY1 protein binding site</b>                                      | ARE: cis-acting regulatory element essential for the anaerobic induction |
| CAAT-box: common cis-acting element in promoter and enhancer regions | Box I: light responsive element                                                | CAAT-box: common cis-acting element in promoter and enhancer regions           | Box I: light responsive element                                          |
| GA-motif: part of a light responsive element                         | CAAT-box: common cis-acting element in promoter and enhancer regions           | CGTCA-motif: cis-acting regulatory element involved in the MeJA-responsiveness | CAAT-box: common cis-acting element in promoter and enhancer regions     |
| L-box: part of a light responsive element                            | CGTCA-motif: cis-acting regulatory element involved in the MeJA-responsiveness | ERE: ethylene-responsive element                                               | ERE: ethylene-responsive element                                         |

|                                                                                   |                                                                                   |                                                                              |                                                                                   |
|-----------------------------------------------------------------------------------|-----------------------------------------------------------------------------------|------------------------------------------------------------------------------|-----------------------------------------------------------------------------------|
| OBP-1 site: cis-acting regulatory element                                         | ELI-box3: elicitor-responsive element                                             | G-Box: cis-acting regulatory element involved in light responsiveness        | G-Box: cis-acting regulatory element involved in light responsiveness             |
| TATA-box: core promoter element around -30 of transcription start                 | GCN4_motif: cis-regulatory element involved in endosperm expression               | GARE-motif: gibberellin-responsive element                                   | GARE-motif: gibberellin-responsive element                                        |
| TC-rich repeats: cis-acting element involved in defense and stress responsiveness | HSE: cis-acting element involved in heat stress responsiveness                    | HSE: cis-acting element involved in heat stress responsiveness               | HSE: cis-acting element involved in heat stress responsiveness                    |
| TCA-element: cis-acting element involved in SA responsiveness                     | MBS: MYB binding site involved in drought-inducibility                            | Skn-1_motif: cis-acting regulatory element required for endosperm expression | MBS: MYB binding site involved in drought-inducibility                            |
| TCT-motif: part of a light responsive element                                     | Skn-1_motif: cis-acting regulatory element required for endosperm expression      | TATA-box: core promoter element around -30 of transcription start            | Skn-1_motif: cis-acting regulatory element required for endosperm expression      |
| Unnamed__4                                                                        | TATA-box: core promoter element around -30 of transcription start                 | TCA-element: cis-acting element involved in SA responsiveness                | TATA-box: core promoter element around -30 of transcription start                 |
| <b>W box: Binds WRKY type transcription factors</b>                               | <b>W box: Binds WRKY type transcription factors</b>                               | <b>W box: Binds WRKY type transcription factors</b>                          | TC-rich repeats: cis-acting element involved in defense and stress responsiveness |
| chs-Unit 1 m1: part of a light responsive element                                 | TC-rich repeats: cis-acting element involved in defense and stress responsiveness | chs-CMA1a: part of a light responsive element                                | as-2-box: involved in shoot-specific expression and light responsiveness          |
| Circadian: cis-acting regulatory element involved in circadian control            | Circadian: cis-acting regulatory element involved in circadian control            | Circadian: cis-acting regulatory element involved in circadian control       | Circadian: cis-acting regulatory element involved in circadian control            |

**Table S4. Promoter analysis of *StWRKY1* gene in resistant and susceptible potato genotypes**

| <b>F06025 WRKY1 promoter</b>                                                        | <b>Shepody WRKY1 promoter</b>                                                     |
|-------------------------------------------------------------------------------------|-----------------------------------------------------------------------------------|
| ABRE: involved in the abscisic acid responsiveness                                  | ABRE: involved in the abscisic acid responsiveness                                |
| ATC-motif: conserved DNA module involved in light responsiveness                    | ATC-motif: conserved DNA module involved in light responsiveness                  |
| Box 4: conserved DNA module involved in light responsiveness                        | Box 4: conserved DNA module involved in light responsiveness                      |
| -                                                                                   | Box I (TTTCAA): light responsive element                                          |
| Box II: part of a light responsive element                                          | Box II: part of a light responsive element                                        |
| -                                                                                   | Box III (CATTTACT): protein binding site                                          |
| Box-W1: WRKY1 protein binding site                                                  | Box-W1: WRKY1 protein binding site                                                |
| CAAT-box: cis-acting element in promoter and enhancer regions                       | CAAT-box: cis-acting element in promoter and enhancer regions                     |
| CGTCA-motif: cis-acting regulatory element involved in the MeJA-responsiveness      | CGTCA-motif: cis-acting regulatory element involved in the MeJA-responsiveness    |
| G-Box: cis-acting regulatory element involved in light responsiveness               | G-Box: cis-acting regulatory element involved in light responsiveness             |
| G-Box: cis-acting regulatory element involved in light responsiveness               | G-Box: cis-acting regulatory element involved in light responsiveness             |
| GA-motif: part of a light responsive element                                        | GA-motif: part of a light responsive element                                      |
| <b>HSE (AGAAAATTCTG): cis-acting element involved in heat stress responsiveness</b> | -                                                                                 |
| I-box: part of a light responsive element                                           | I-box: part of a light responsive element                                         |
| MBS: MYB Binding Site                                                               | MBS: MYB Binding Site                                                             |
| MNF1: light responsive element                                                      | MNF1: light responsive element                                                    |
| MRE: MYB binding site involved in light responsiveness                              | MRE: MYB binding site involved in light responsiveness                            |
| O2-site: cis-acting regulatory element involved in zein metabolism regulation       | O2-site: cis-acting regulatory element involved in zein metabolism regulation     |
| Skn-1_motif: cis-acting regulatory element required for endosperm expression        | Skn-1_motif: cis-acting regulatory element required for endosperm expression      |
| TATA-box                                                                            | TATA-box                                                                          |
| TATCCAT/C-motif:                                                                    | TATCCAT/C-motif:                                                                  |
| TC-rich repeats: cis-acting element involved in defense and stress responsiveness   | TC-rich repeats: cis-acting element involved in defense and stress responsiveness |
| TGA-element: auxin-responsive element                                               | TGA-element: auxin-responsive element                                             |

|                                                                                |                                                                                |
|--------------------------------------------------------------------------------|--------------------------------------------------------------------------------|
| TGACG-motif: cis-acting regulatory element involved in the MeJA-responsiveness | TGACG-motif: cis-acting regulatory element involved in the MeJA-responsiveness |
| Unnamed__4                                                                     | Unnamed__4                                                                     |
| Unnamed__5                                                                     | Unnamed__5                                                                     |
| W box: WRKY binding site                                                       | W box: WRKY binding site                                                       |
| Circadian: is-acting regulatory element involved in circadian control          | Circadian: is-acting regulatory element involved in circadian control          |

**Table S5. The differentially expressed heat shock proteins (HSPs) detected in potato following *P. infestans* inoculation using RNA-seq analysis**

| Gene name                                               | PGSC ID <sup>a</sup> | Chromosome | FPKM F06025 | FPKM Russet Burbank | log <sub>2</sub> (fold change) | P value              | Q value             |
|---------------------------------------------------------|----------------------|------------|-------------|---------------------|--------------------------------|----------------------|---------------------|
| Prefoldin chaperone subunit family protein              | PGSC0003DMG400001646 | 1          | 13.6312     | 3.48311             | 1.96847                        | 0.000932             | 0.032868            |
| Heat shock protein 17.8                                 | PGSC0003DMG400019137 | 10         | 17.8939     | 0.235663            | 6.2466                         | 4.88E <sup>-12</sup> | 2.7E <sup>-09</sup> |
| HSP26.5<br>(26.5 kDa heat shock protein, mitochondrial) | PGSC0003DMG400028624 | 12         | 2.16571     | 0.245899            | 3.1387                         | 0.000958             | 0.033606            |

<sup>a</sup> Solanaceae Genomics Resource, Michigan State University, USA.

FPKM, Fragments per kilo base of exon per million fragments mapped; Q value, the false discovery rate (FDR)-adjusted p-value of the test statistic.

F06025- Resistant potato genotype, Russet Burbank- Susceptible potato genotype.

**Cufflinks-2.0.1** program was used to find significant changes in transcript expression.
